# Supplementary material for: Creation of hollow microtubular iron oxalate dihydrate induced by a metallo-supramolecular micelle based on the self-assembly of potassium ferrioxalate and sodium dodecyl sulphate
Source: Royal Society of Chemistry journal article supplement (doi:10.1039/c5ra01703c), 2015-01-01
Supplement: c5ra01703c1.pdf [file c5ra01703c1.pdf]

# Supporting Information

## Creation of Hollow Microtubular Iron Oxalate Dihydrate Induced by a Metallo-Supramolecular Micelle Based on the Self-assembly of Potassium Ferrioxalate and Sodium Dodecyl Sulphate

Yue Teng<sup>a</sup>, Le Xin Song<sup>\*,a,b</sup>, Wei Liu<sup>\*,a</sup>, Juan Xia<sup>a</sup>, Li Zhao<sup>b</sup>, Qing Shan Wang<sup>b</sup>, Mao Mao Ruan<sup>b</sup>

<sup>a</sup> CAS Key Laboratory of Materials for Energy Conversion, Department of Materials Science and Engineering, University of Science and Technology of China, Jin Zhai Road 96, Hefei, China 230026

<sup>b</sup> Department of Chemistry, University of Science and Technology of China, Jin Zhai Road 96, Hefei, China 230026

Email: [solexin@ustc.edu.cn](mailto:solexin@ustc.edu.cn); [wliu@ustc.edu.cn](mailto:wliu@ustc.edu.cn);

Fax: +86-551-63601592

### A list of the contents for all the Supporting Information

| Pages | Contents                                                                                                                                                                                                                                                                                                                                                      |
|-------|---------------------------------------------------------------------------------------------------------------------------------------------------------------------------------------------------------------------------------------------------------------------------------------------------------------------------------------------------------------|
| 1     | A table of contents.                                                                                                                                                                                                                                                                                                                                          |
| 2     | Experimental Section                                                                                                                                                                                                                                                                                                                                          |
| 3     | The $\kappa$ values of the solutions of PF in the absence and presence of SDS at 293 K.                                                                                                                                                                                                                                                                       |
| 4     | The transparent solution obtained in the hydrothermal processes of PF ( $5.00 \times 10^{-3}$ mol dm <sup>-3</sup> ) in the presence of SDS ( $8.68 \times 10^{-2}$ mol dm <sup>-3</sup> ).                                                                                                                                                                   |
| 5     | Powder XRD patterns of the Fe <sub>2</sub> O <sub>3</sub> obtained in the hydrothermal processes of PF ( $2.50 \times 10^{-2}$ mol dm <sup>-3</sup> ) in the presence of $8.68 \times 10^{-2}$ mol dm <sup>-3</sup> <i>n</i> -octane, hexadecyl trimethyl ammonium bromide, sodium dodecylbenzenesulfonate, sodium sulfate and sodium sulfite instead of SDS. |
| 6     | The TG and DTG profiles of the IOD-1 crystals.                                                                                                                                                                                                                                                                                                                |
| 7     | Powder XRD pattern and SEM image of IOD-3.                                                                                                                                                                                                                                                                                                                    |
| 8     | DLS curves of the PF-SDS-SM in the solutions of SDS ( $8.68 \times 10^{-2}$ mol dm <sup>-3</sup> ) in the presence of PF ( $2.50 \times 10^{-2}$ mol dm <sup>-3</sup> , a; and $5.00 \times 10^{-2}$ mol dm <sup>-3</sup> , b).                                                                                                                               |
| 9     | SEM image of the IOD-1 before removal of SDS micelles.                                                                                                                                                                                                                                                                                                        |

## Experimental Section

**Materials:** Sodium dodecyl sulphate (SDS) and potassium ferrioxalate (PF) were obtained from Shanghai Chemical Reagent.

**Synthesis of metallosurfactants of PF and SDS:** 0.5 g PF was dissolved in 40 mL of H<sub>2</sub>O at 298 K, and then 1.0 g of SDS was dissolved in the PF solution, generating a mixed solution of PF and SDS. A series of solutions composed of PF and SDS were also prepared using the same method but with different initial masses.

**Hydrothermal experiments:** A solution with  $8.68 \times 10^{-2}$  mol dm<sup>-3</sup> SDS and  $2.50 \times 10^{-2}$  mol dm<sup>-3</sup> PF was completely transferred into a 50 mL sealed stainless steel autoclave and heated to 473 K for 4 h. Fine blond tube-like crystals (FeC<sub>2</sub>O<sub>4</sub> · 2H<sub>2</sub>O, 0.14 g, 76%) were collected by filtration, washed several times with distilled water and ethanol, and dried in vacuum. The synthesis is repeated but with other two concentrations, giving either a reddish-brown powder for  $8.68 \times 10^{-3}$  mol dm<sup>-3</sup> SDS or no precipitation for  $5.0 \times 10^{-3}$  mol dm<sup>-3</sup> PF.

**Characterization:** Field emission scanning electron microscopy (FESEM, Supra 40) has been used to produce the structural information. In addition, the crystallinity of the samples was determined by the powder X-ray diffraction pattern (XRD) (Philips X'Pert Pro X-ray diffractometer) using a monochromatized Cu K $\alpha$  radiation source (40 kV, 40 mA) with a wavelength of 0.1542 nm and analyzed in the range  $10^\circ \leq 2\theta \leq 80^\circ$ . Thermogravimetry and derivative thermogravimetry (TG/DTG) measurements were determined on a TGA-50 thermogravimetric analyzer at a constant heating rate of 10.0 K min<sup>-1</sup> in air. The hydrodynamic radius of the micelles was obtained on a DynaPro-MS800 dynamic light scattering (DLS) instrument (Protein Solution, Lakewood, NJ) equipped with a thermostatic sample chamber.

**Conductivity measurements:** A Leici DDSJ-308 conductivity meter with automatic temperature compensation and automatic calibration was used to record the conductivity of solutions at 298 K. A conductance cell with a cell constant of 0.984 cm<sup>-1</sup> was used in a water bath whose temperature was kept at 298 K.

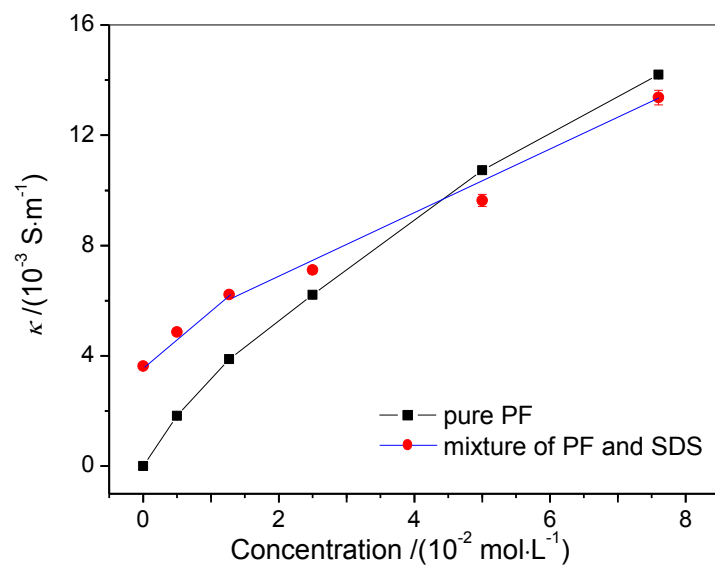

**Fig. S1** The  $\kappa$  values of the solutions of PF in the absence and presence of SDS ( $C_{\text{SDS}}, 8.68 \times 10^{-2} \text{ mol dm}^{-3}$ ;  $C_{\text{PF}}, 0 \sim 7.60 \times 10^{-2} \text{ mol dm}^{-3}$ ). The  $\kappa$  was calculated as an average of three repeated measurements at 293 K.

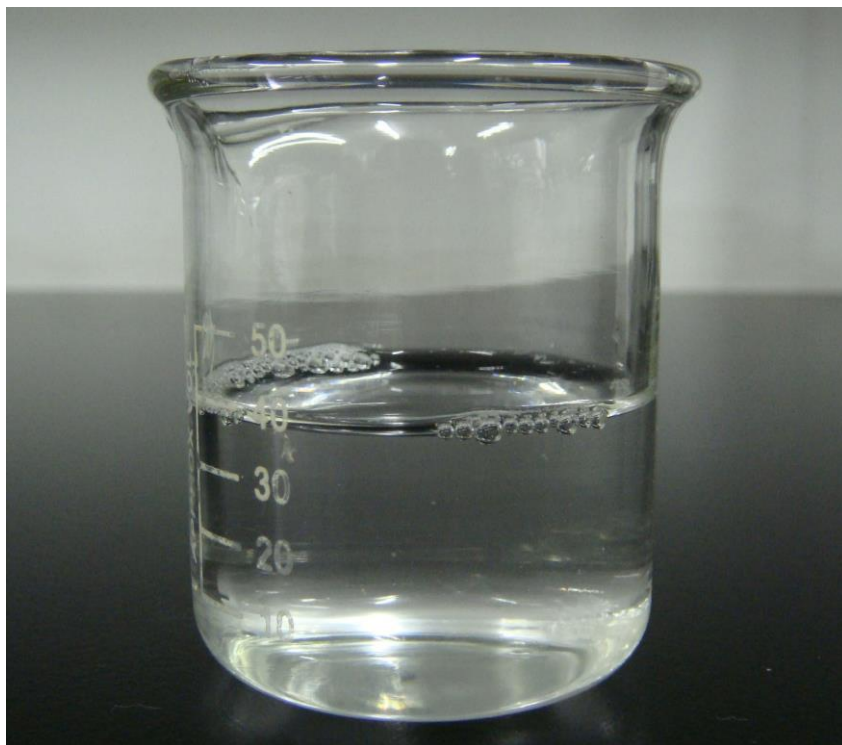

**Fig. S2** The transparent solution obtained in the hydrothermal processes of PF ( $5.00 \times 10^{-3} \text{ mol dm}^{-3}$ ) in the presence of SDS ( $8.68 \times 10^{-2} \text{ mol dm}^{-3}$ ).

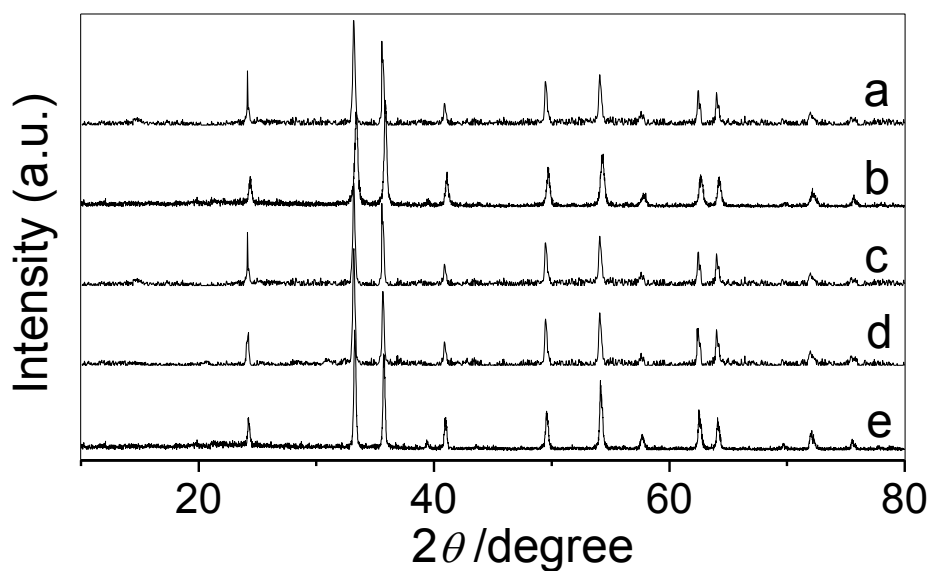

**Fig. S3** Powder XRD patterns of the Fe<sub>2</sub>O<sub>3</sub> obtained in the hydrothermal processes of PF ( $2.50 \times 10^{-2} \text{ mol dm}^{-3}$ ) in the presence of *n*-octane (a), hexadecyl trimethyl ammonium bromide (b), sodium dodecylbenzenesulfonate (c), sodium sulfate (d) and sodium sulfite (e) with the concentration of  $8.68 \times 10^{-2} \text{ mol dm}^{-3}$ .

The thermogravimetric and differential thermogravimetric profiles (Figure S4) of the crystal tubes in air show a two-step degradation process. The first degradation occurred at 445 K with a weight loss of 19.3%, corresponding to the release of two water molecules, which agrees well with the calculated value of 19.0% in IOD. The second degradation occurred at 657 K with a final residual mass of 46.6% due to the  $\text{Fe}_2\text{O}_3$  (calculated value of 46.5%) resulted from the oxidation of IOD.<sup>1</sup>

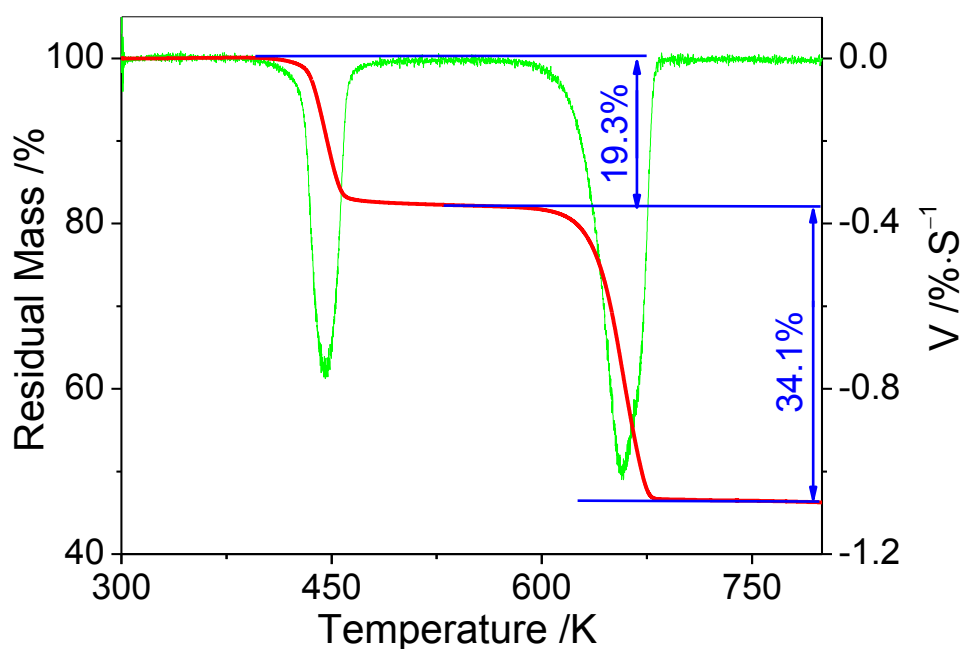

**Fig. S4** The TG and DTG profiles of the IOD-1 crystals.

1 a) M. Hermanek, R. Zboril, M. Mashlan, L. Machala, O. Schneeweiss, *J. Mater. Chem.*, 2006, **16**, 1273. b) C. Cavelius, K. Moh, S. Mathur, *Cryst. Growth. Des.*, 2012, **12**, 5948. c) Z. Dang, L. X. Song, J. Yang, J. Chen, Y. Teng, *Dalton T.*, 2012, **41**, 3006.

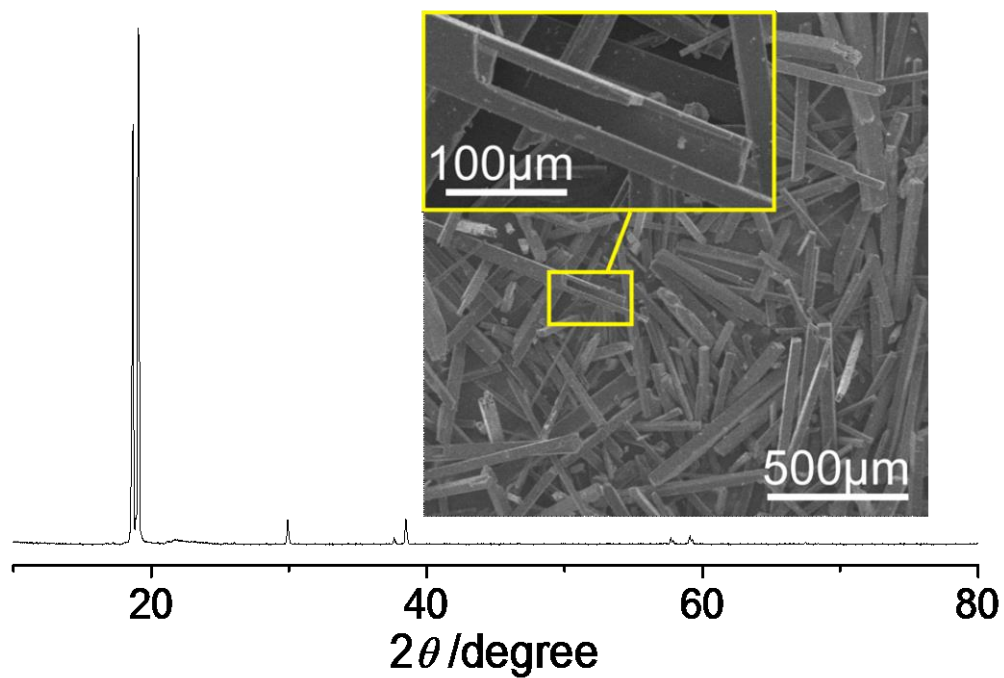

**Fig. S5** The powder XRD pattern and SEM image of IOD-3 obtained in the hydrothermal processes of PF ( $2.50 \times 10^{-2} \text{ mol dm}^{-3}$ ) in the presence of SDS ( $5.00 \times 10^{-2} \text{ mol dm}^{-3}$ ). The yellow boxes exhibit the magnified SEM image of one tube.

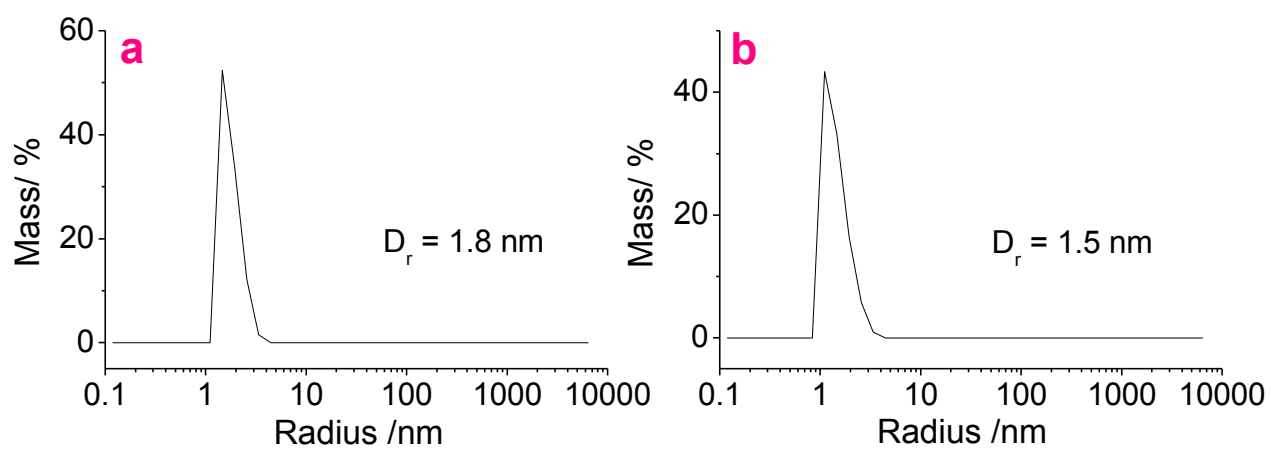

**Fig. S6** DLS curves of the PF-SDS-SM in the solutions of SDS ( $8.68 \times 10^{-2} \text{ mol dm}^{-3}$ ) in the presence of PF ( $2.50 \times 10^{-2} \text{ mol dm}^{-3}$ , a; and  $5.00 \times 10^{-2} \text{ mol dm}^{-3}$ , b).



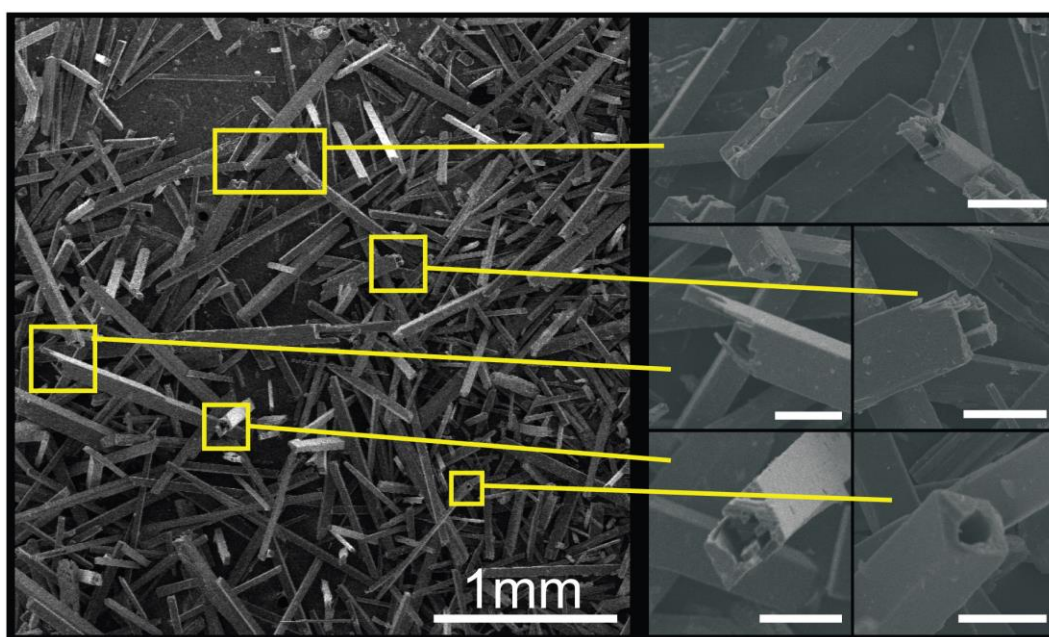

**Fig. S7** SEM image of the IOD-1 before removal of SDS micelles. The yellow boxes exhibit magnified cross sections of the tubes. The white bars in the right column refer to 100  $\mu\text{m}$ .
